# Supplementary material for: Precise surface patterning of silk fibroin films by breath figures
Source: Royal Society of Chemistry journal article supplement (doi:10.1039/c2sm25089f), 2012-01-01
Supplement: c2sm25089f.pdf [file c2sm25089f.pdf]

## Supplementary Information Material

### XRD measurement of silk fibroin films

Silk fibroin films were formed by pipetting a volume (50  $\mu$ l) of the aqueous or HFIP solutions (1-5 % - w/v) from regenerated silk fibroin onto the substrate to cover the available surface area of PDMS or patterned PDMS. The films were dried in air in a fume hood overnight. One from each pair was immersed in methanol to induce structural change. XRD method was used to study crystalline structure of silk fibroin film.

|          | silk fibroin % and solvent       | Casting surface | post treatment                              |
|----------|----------------------------------|-----------------|---------------------------------------------|
| <b>a</b> | 2% AASF11 (w/v) H <sub>2</sub> O | PDMS            | untreated                                   |
| <b>c</b> | 2% AASF11 (w/v) HFIP             | patterned PDMS  | untreated                                   |
| <b>g</b> | 2% AASF6 (w/v) H <sub>2</sub> O  | PDMS            | treated in MeOH (2 h)                       |
| <b>i</b> | 2% AASF11 (w/v) HFIP             | patterned PDMS  | treated in MeOH (10 min) and water (4 days) |

X-ray diffractograms of the silk fibroin films:

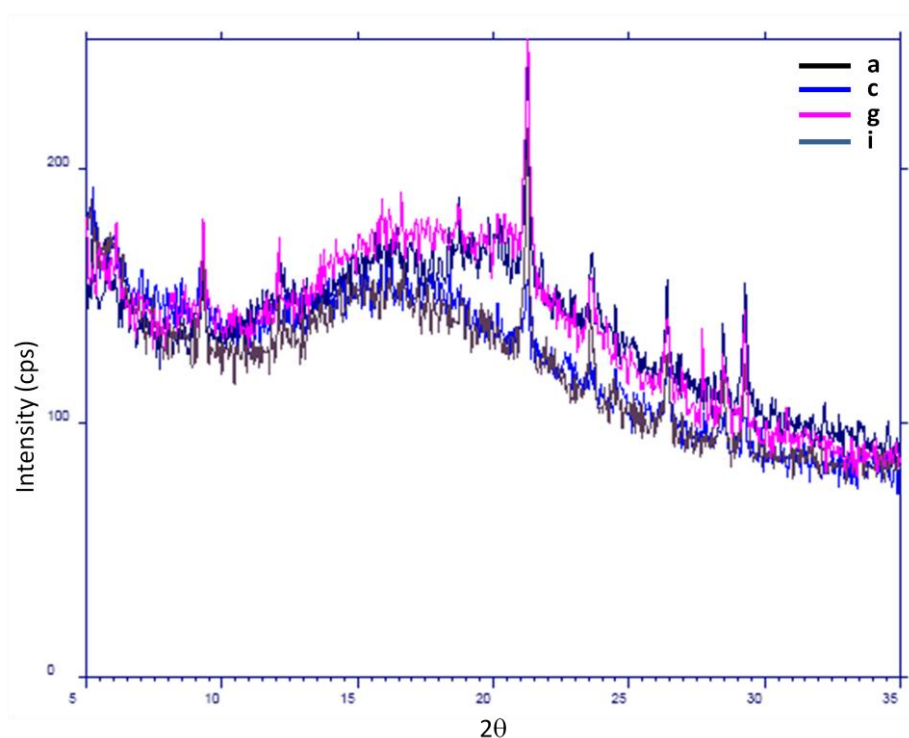

Diffraction peaks at 8.7, 19.6, 23.3° corresponding to  $\beta$ -sheet crystalline spacing and 10.1, 4.5, 3.8° to amorphous state.\*

\*Um et al. *International Journal of Biological Macromolecules* **2001**, 29, 91.

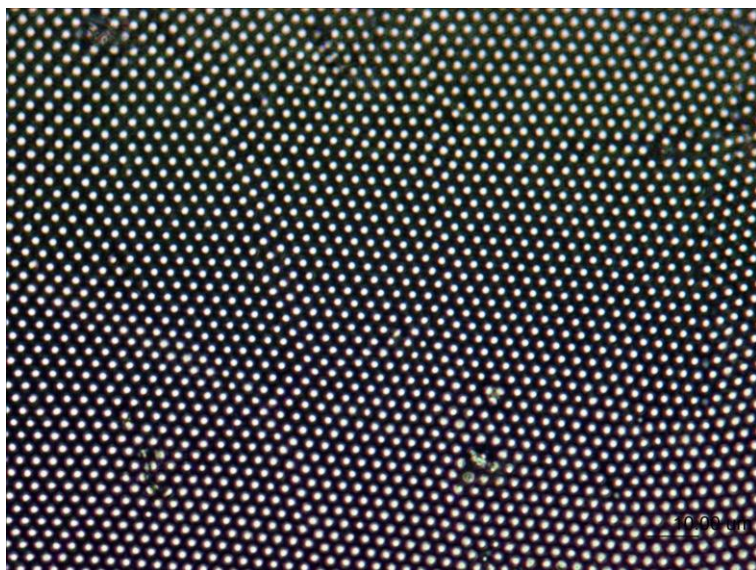

Silk fibroin film with convex microlens patterning obtained by casting from water solution on a PS template pre-treated with plasma

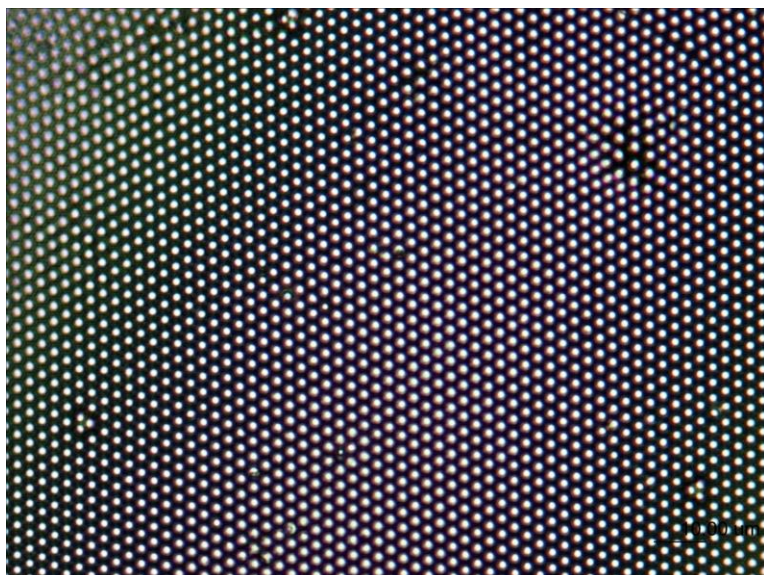

Silk fibroin film with convex microlens patterning obtained by casting from water solution on a PS template pre-treated with MeOH

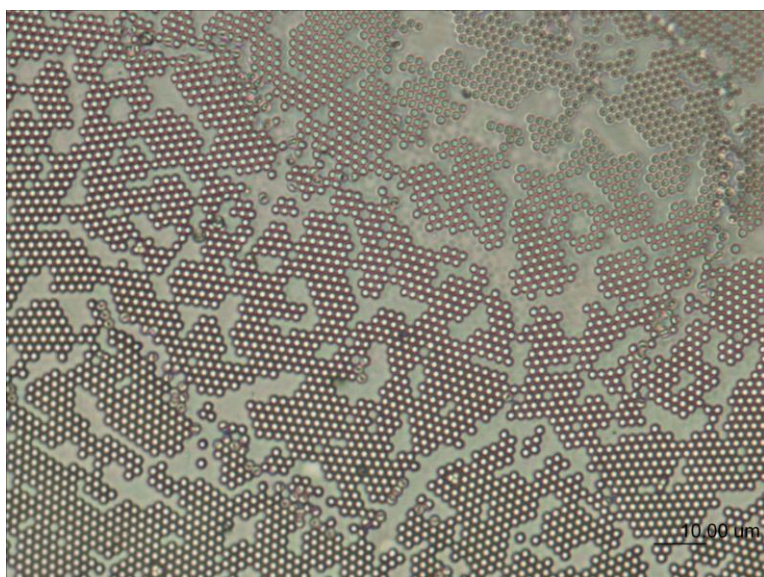

Silk fibroin film with convex microlens patterning obtained by casting from water solution on a PS template without pre-treatment



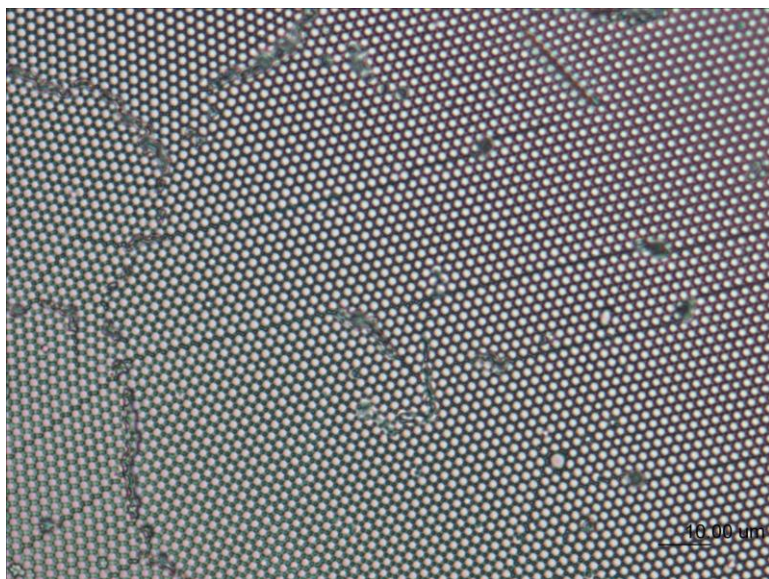

Silk fibroin film with concave microlens patterning obtained by casting from water solution on a PMDS template without pre-treatment

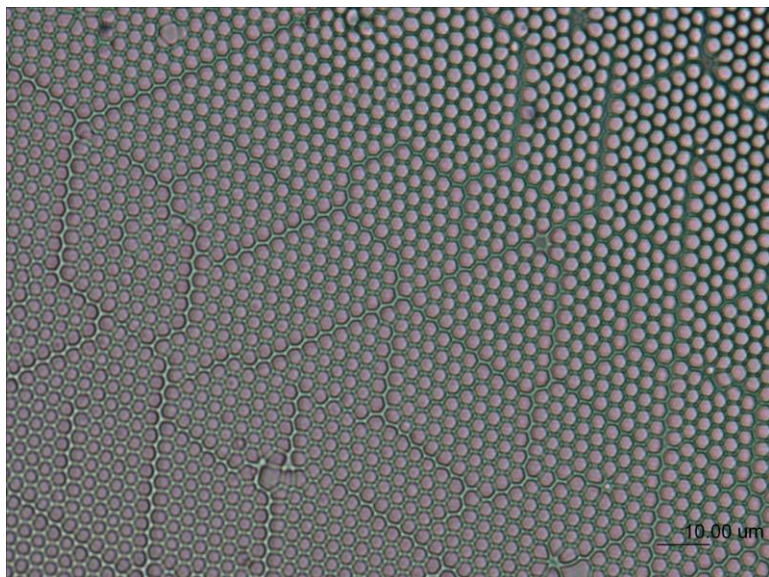

Silk fibroin film with concave microlens patterning (bigger size) obtained by casting from water solution on a PMDS template without pre-treatment

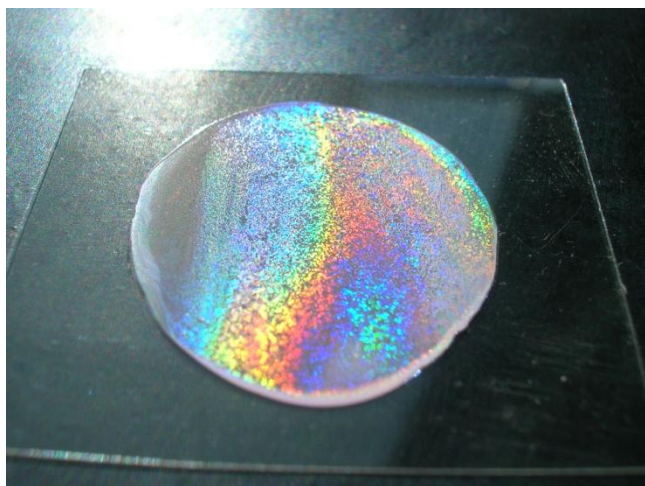

PS patterned film prepared by breath figure method, showing structural colors.
